# Supplementary material for: Reactive nitrogen around the Arabian Peninsula and in theMediterranean Sea during the 2017 AQABA ship campaign
Source: Copernicus journal article supplement (doi:10.5194/acp-2021-42), 2021-01-21
Supplement: Supplementary file [file acp-2021-42-AC2-supplement.pdf]

## Author's Response to Referee #2

*In this response, the referee comments (in black) are listed together with our replies (in blue) and the changes to the original manuscript (in red).*

Friedrich et al. report on measurements of 'reactive nitrogen' as part of the shipborne 2017 AQABA campaign. Data were acquired using a custom-built thermal dissociation cavity ring-down spectrometer recently described by Friedrich et al. (2020) supplemented by numerous auxiliary measurements. In this paper, the authors dive into some of the analysis of this rich data set, focussing on the conversion of  $\text{NO}_x$  to  $\text{NO}_z$  in 3 regions, on HONO budgets and on ozone production efficiencies.

The paper is written well. It is a bit too long, and there were some organizational shortcomings (see below) that should be addressed before the paper is accepted.

We thank the referee for the constructive review of our paper and the detailed comments, which we will address in the following responses.

### Major comments

#### 1) Organizational / presentation issues

$\text{NO}_z/\text{NO}_x$  ratios were investigated in 3 regions (3.1-3.3 - Mediterranean Sea, Red Sea, and Arabian Gulf). It is not sufficiently clear why the data set was divided in this way.

An extended explanation has been added in the introduction to Sect. 3.

Dividing the analysis into the three regions helps to highlight the chemically different environments encountered. An analysis of the Arabian Sea region was unfortunately not possible due to a gap in the  $\text{NO}_z$  measurements between 9 and 17 August 2017, caused by instrument failure during heavy seas and winds. The division into the regions was based on the prevalent  $\text{NO}_x$  mixing ratios displayed in Fig. S3c. In contrast to other AQABA publications (Eger et al., 2019; Pfannerstill et al., 2019; Tadic et al., 2020), the Gulf of Oman and the Suez Channel were included in the Arabian Gulf and the Red Sea regions, respectively, as a clear shift in  $\text{NO}_x$  to mixing ratios below ca. 1 ppbv occurred both upon leaving the Gulf of Oman into the Arabian Sea and upon exiting the Suez Channel to the north towards the Mediterranean Sea. The transitions between the Arabian Gulf and the Gulf of Oman, and between the Northern Red Sea and the Suez region are less obviously represented in the  $\text{NO}_x$  levels.

(b) A brief but incomplete analysis of HONO is presented in section 3.4. The introduction does not mention HONO (other than in R5) and this section appears "out of the blue". Consider removing this section if the plan is to write a separate paper on HONO anyways.

We would preferably keep Sect. 3.4 in the manuscript in its current form, introducing the potential role of HONO as a NO<sub>x</sub> source on AQABA, as this is an important finding of this study. A more comprehensive analysis of the HONO data set is outside the scope of this paper, but will be subject of a future publication. We thank the reviewer for pointing out that Sect. 3.4 is not sufficiently included into the flow of the main text, which has been amended in several places:

a) HONO photolysis as a source of NO<sub>x</sub> is now mentioned in the introduction:

NO<sub>x</sub> can be reformed from HONO at daytime through photolysis, with a noontime lifetime of ca. 20-30 minutes (Stutz et al., 2000).

b) Sect. 3.4 is now referenced in the outline part of the introduction:

In this paper we present NO<sub>x</sub>, NO<sub>y</sub> and NO<sub>z</sub> mixing ratios obtained by a thermal dissociation cavity-ringdown-spectrometer (TD-CRDS), together with a comprehensive set of ancillary measurements and an analysis of the results in terms of photochemical processing/aging of air masses, chemical sources of NO<sub>x</sub> (e.g. from the photolysis of HONO), and the efficiency of ozone formation.

c) Sect. 3.4 is now referenced at the beginning of the results section (Sect. 3):

Chemical sources of NO<sub>x</sub> e.g. from the photolysis of HONO or pNit are discussed in Sect. 3.4.

An additional literature source has been added to strengthen the discussion on HONO linked to ship emissions.

Ship-derived HONO has a substantial effect on the rates of photochemical O<sub>3</sub> formation in the remote marine boundary layer, largely as a result of higher RO<sub>x</sub> production rates (Dai and Wang, 2021).

(d) Information already presented elsewhere should be removed and the previous paper(s) cited - e.g., Fig 1 of this paper is similar to Fig 1 / Fig 3 of Tadic et al. (2020), Fig 9 and 13 and Table 1 of this paper and Fig 7 of Eger et al. (2019). Likewise, rather than describing the TD-CRDS over 2 pages (section 2.1 - page 4 and 5) I would suggest simply citing the earlier Friedrich et al. (2020) manuscript.

Figure 1a has been moved to the supplement.

Section 2.1 has been substantially shortened to focus on information which is not given in Friedrich et al. (2020) and which is relevant to the presented AQABA data sets (see revised manuscript version with 'track changes').

(e) Pages 2-3. The section on nitrogen oxide chemistry in the introduction is written well, but in my opinion is not needed - similar sections of text have been presented

numerous times, including by the authors themselves in recent papers. It would have been more informative and interesting to tell the reader about what made the AQABA campaign interesting and worthwhile (e.g., effects of temperature/climate and mineral dust on nitrogen oxides, special/unique NO<sub>x</sub> sources in the regions etc.) and add more background on ozone production efficiencies (see g).

The chemistry part of the introduction has been shortened, focusing on reactions involving NO<sub>z</sub> species which are later discussed in the results section (see revised manuscript version with 'track changes').

The scientific motivation for the AQABA campaign has been extended:

Emissions from oil exploration provide a complex atmospheric mixture of NO<sub>x</sub> and anthropogenic VOCs. The presence of desert dust can have a significant impact on the budget of inorganic acids such as HNO<sub>3</sub>. Finally, the overall elevated temperatures and actinic fluxes on AQABA promote rapid photochemical processing of NO<sub>x</sub>. We therefore expect a more varied and complex chemistry than found in remote marine locations.

See g) for the novel paragraph on the OPE in the introduction.

(f) A table summarizing the various measurements and techniques would help.

Such a table is now provided (see Table 1).

(g) The OPE values calculated need to put more into context of existing literature (pg 19 lines 24-30). Consider stating in the introduction what values are typical or would be expected and expand the discussion.

The OPE explanation has been moved to the introduction and extended with more literature context:

The ozone production efficiency (OPE), a metric used in the analysis of the O<sub>3</sub> formation, quantifies the fractional transformation of primarily emitted NO<sub>x</sub> to O<sub>3</sub> (Liu et al., 1987; Trainer et al., 1993) and thus reflects the relative importance of competing photochemical processes leading to O<sub>3</sub> and NO<sub>z</sub> formation from NO<sub>x</sub>. High values of OPE are favoured by low OH and VOC concentrations and values exceeding 80 have been reported for remote marine environments. Low, single digit values have been observed in polluted urban environments (Rickard et al., 2002; Wang et al., 2018). The location-dependence of the OPE can be further classified with previous observations from the literature. Minimal OPEs in urban environments between 1 and 2 have been reported from the Beijing area (Lin et al., 2011; Ge et al., 2013) and from the USA (Daum et al., 2000; Sillman, 2000; Nunnermacker et al., 2004). In rural and suburban environments, the OPE can increase to values between 10 and 15, as demonstrated in Northern America (Olszyna et al., 1994; Roussel et al., 1996; Fried et al., 1997; Ninneman et al., 2017) and in China (Sun et al., 2010). From oceanic samples, OPEs

of 65 and 87 were observed on the south-eastern coast of the UK (Rickard et al., 2002) and on Sable Island, Canada (Wang et al., 1996). Flights over the Western Pacific Ocean found values of 102-246 in the tropical area (latitude 0-18 °N), and of 73-209 further north (18-42 °N) (Davis et al., 1996). For the AQABA campaign, we expect lower OPEs than those observed in remote oceanic locations, due to the variable influx from harbours, coastal pollution and surrounding ship traffic.

(2) (Perceived) lack of novelty.

There have already been at least 7 papers presenting results from the AQABA campaign, yet the introduction avoids telling the reader what was presented in the earlier papers. In the introduction, it should make clear to the reader what new information and/or analysis are presented in this paper and why this paper is worthwhile. In particular, it should be stated how this paper differentiates itself from Tadic et al. (2020), "Net ozone production and its relationship to nitrogen oxides" to avoid the perception of duplication (in particular of section 3.5).

We have now included a summary of previous AQABA papers into the introduction and explain the novelty of this paper:

Previous analyses from this campaign focussed on sources and sinks of non-methane hydrocarbons (Bourtsoukidis et al., 2019), the role of OH reactivity in ozone chemistry (Pfannerstill et al., 2019), formation of ClNO<sub>2</sub> (Eger et al., 2019), ethane and propane emissions from the Red Sea (Bourtsoukidis et al., 2020), emission factors in ship plumes (Celik et al., 2020), marine emissions of methane sulfonamide (Edtbauer et al., 2020), rates of net O<sub>3</sub> production (Tadic et al., 2020), and the abundance of carbonyl compounds .

In this paper we present NO<sub>x</sub>, NO<sub>y</sub> and NO<sub>z</sub> mixing ratios obtained by a thermal dissociation cavity-ringdown-spectrometer (TD-CRDS), together with NO and NO<sub>2</sub> mixing ratios from a chemiluminescence detector and, a comprehensive set of ancillary measurements and an analysis of the results in terms of photochemical processing/aging of air masses, chemical sources of NO<sub>x</sub> (e.g. from the photolysis of HONO), and the efficiency of ozone formation..

Following a comment from referee #1 we explained the differences between OPE and NOPR in Sect. 3.5:

In contrast to the OPE, NOPR accounts for the total amount of O<sub>3</sub> produced in one day, considering production (governed by the formation of NO<sub>2</sub> via reactions of NO with HO<sub>2</sub> and RO<sub>2</sub>) and loss (via photolysis and reaction with OH or HO<sub>2</sub>). The OPE, on the other hand, focusses on the product side and assesses the competition between O<sub>3</sub> formation and sequestering into NO<sub>z</sub> from a given initial level of NO<sub>x</sub>. By approximating the O<sub>3</sub> production rate via the NO<sub>2</sub> formation from NO reactions with HO<sub>2</sub> and RO<sub>2</sub>, the NOPR thus neglects the alternative branch leading to NO<sub>z</sub>.

(3) NO<sub>x</sub> lifetime - pg 9 line 30.

The equation given here is too simplistic in my opinion. Equation (1) should account for  $\text{N}_2\text{O}_5$  formation, which can increase the  $k_{13}[\text{O}_3]$  term by a factor of up to 2 (see Brown, S. S., et al. (2004), Nighttime removal of  $\text{NO}_x$  in the summer marine boundary layer, *Geophys. Res. Lett.*, 31(7), L07108, doi:10.1029/2004GL019412.). There are also sinks such as the heterogeneous conversion of  $\text{NO}_2$  to HONO/ $\text{HNO}_3$  that may need to be considered (mentioned on page 18, lines 8-).

We have added explanations for the omission of these two processes:

By using Eq. 1 to approximate the  $\text{NO}_2$  loss rate constant, we neglect two further processes which can, under some conditions, influence the lifetime of  $\text{NO}_2$ . Our approach assumes that the nighttime formation of  $\text{NO}_3$  leads to the removal of one  $\text{NO}_2$  molecule. This approach would be invalid, if a significant fraction of  $\text{NO}_3$  would be lost via formation (and subsequent heterogeneous loss) of  $\text{N}_2\text{O}_5$ . Firstly, we note that formation of  $\text{N}_2\text{O}_5$  was hindered during AQABA by the high gas-phase reactivity of  $\text{NO}_3$  towards VOCs (Eger et al., 2019) and that the transfer of  $\text{N}_2\text{O}_5$  to the particle phase was hindered by high temperatures. For example, taking an  $\text{N}_2\text{O}_5$  uptake coefficient  $\gamma_{\text{N}_2\text{O}_5}$  of 0.03 (as found for polluted marine environments by Aldener et al. (2006)) and the median nighttime aerosol surface area (ASA) in the Mediterranean Sea of  $1.78 \times 10^{-6} \text{ cm}^2 \text{ cm}^{-3}$  (Eger et al., 2019), we estimated a loss rate constant for uptake of  $\text{N}_2\text{O}_5$  of  $3.5 \times 10^{-4} \text{ s}^{-1}$ , which is two orders of magnitude lower than the rate constant ( $4.9 \times 10^{-2} \text{ s}^{-1}$ ) for thermal decomposition at  $25.7^\circ \text{C}$  (the mean, minimum nighttime temperature in the Mediterranean Sea).

We also neglect the loss of  $\text{NO}_x$  via uptake of  $\text{NO}_2$  onto black carbon (BC) particles. Using a literature uptake coefficient  $\gamma_{\text{NO}_2}$  of ca.  $1 \times 10^{-4}$  (Longfellow et al., 1999) and the aforementioned ASA, the first order loss rate constant for the heterogeneous uptake would be  $1.8 \times 10^{-6} \text{ s}^{-1}$ . Using an  $\text{O}_3$  mixing ratio of 63.4 ppbv (= nighttime median mixing ratio in the Mediterranean Sea), we calculate a first-order loss rate constant for the reaction of  $\text{NO}_2$  and  $\text{O}_3$  of  $5.5 \times 10^{-5} \text{ s}^{-1}$ , which implies that > 95 % of total  $\text{NO}_2$  loss at nighttime  $\text{NO}_2$  is due to  $\text{O}_3$ . Uptake of  $\text{NO}_2$  might therefore be relevant for HONO formation (see Sect. 3.4), but does not constitute a relevant loss process for  $\text{NO}_x$ .

### Minor/Specific comments

In the future, please number continuously and do not restart numbering on each page. You are creating more work for the reviewer which is in nobody's interest.

Thank you for the advice, which we will be following in future publications. We had been using the .docx template provided by Copernicus without further considering the line numbering.

Abstract, line 20 - HONO. Consider stating how the role of HONO was assessed (were there measurements?)

Has been added:

The role of HONO was assessed by calculating the NO<sub>x</sub> production rate from its photolysis.

Abstract line 24 - OPE. Consider stating how OPE were calculated (plots of  $\Delta O_3$  vs  $\Delta NO_z$  ?)

We now mention the method in the abstract:

Regional ozone production efficiencies (OPE; calculated from the correlation between O<sub>x</sub> and NO<sub>z</sub>, where O<sub>x</sub> = O<sub>3</sub> + NO<sub>2</sub>) ranged from [...]

pg 1 line 8 - Please define "M"

[...] where M is a collision partner.

pg 3 line 2 - "lifetimes of a few hours". The lifetime of PAN may be much longer aloft are in Arctic environments.

The sentence has been removed while shortening the introduction as requested.

pg 4 line 19 - please specify the make/model of the 3-way valve and state what the internal surfaces are made of.

The valve is made out of PTFE and was obtained from Neptune Research, Inc. (type 648T032, orifice diameter 4 mm). This information, however, was already given in Friedrich et al. (2020) and was removed from the revised manuscript in order to shorten the paper as requested by the referee.

pg 4 line 31 "adding 19 ppmv of O<sub>3</sub>" - Please clarify if this mixing ratio refers to the amount of O<sub>3</sub> (in O<sub>2</sub>?) added (in which case also state the flow) or if "19 ppmv" refers to the amount of O<sub>3</sub> after addition to the sampled air.

The O<sub>3</sub> mixing ratio of 19 ppmv was detected in the sampling flow of the TD-CRDS, i.e. after diluting in ca. 3 slm synthetic air. This information, however, was already given in Friedrich et al. (2020) and was removed from the revised manuscript in order to the paper as requested by the referee.

pg 5 line 4. Does the TD-CRDS respond to nitrate associated with mineral dust which may occur in the study area (e.g., <https://acp.copernicus.org/articles/16/1491/2016/>)?

We expect only a weak (if any) response to nitrates on mineral dust, as we write in Sect. 3.1.2:

“Detection of coarse mode pNit by the TD-CRDS (see Friedrich et al. (2020)) would lead to an overestimation of  $\text{HNO}_3$ . However, given that the thermal dissociation to  $\text{NO}_2$  of  $\text{NaNO}_3$  particles with 300 nm diameter is inefficient ( $\sim 20\%$ ) with this instrument, a significant bias by coarse mode nitrate (e.g. associated with sea salt or mineral dust) appears unlikely.”

In Sect. 2.1 we also discuss that coarse mode nitrates were only encountered in short periods in high abundancies:

“The fractional contribution of coarse-mode particles to the overall mass concentration were derived using data from an Optical Particle Counter (OPC) and via the  $(\text{PM}_{10}-\text{PM}_1)/\text{PM}_{10}$  ratio (both  $\text{PM}_1$  and  $\text{PM}_{10}$  were measured with the OPC). We see from Fig. S1 that the impact of coarse mode nitrate may have been largest on both legs in the transitional area between Southern Red Sea and Arabian Sea, where OPC  $\text{PM}_{10}$  mass concentrations exceeded  $150\text{ }\mu\text{g m}^{-3}$  and the coarse mode fraction was consistently  $> \text{ca. } 90\%$ .”

pg 5 line 20. Please state here how the detection limit was defined (move up from line 27) and also state how long data were averaged (longer averaging times => better detection limits).

The information has been moved and refined:

The total uncertainty (at 50 % relative humidity and one minute integration time) amounts to 11 % + 10 pptv for  $\text{NO}_x$  and to 16 % + 14 pptv for  $\text{NO}_z$  if we disregard the non-quantitative detection of coarse-mode, non-refractory nitrate (see below). Detection limits (5 s integration time) during the AQABA campaign were 98 pptv for  $\text{NO}_x$ , 51 pptv for  $\text{NO}_y$ , and 110 pptv for  $\text{NO}_z$  and are higher than those reported for laboratory operation owing to problems with optical alignment due to the motion of the ship. Detection limits are defined as the  $2\sigma$  standard deviation between consecutive zeroing periods. Under laboratory conditions,  $\text{NO}_x$  detection limits of 40 pptv (1 min average) were obtained (Friedrich et al., 2020); 6 pptv (40 s) have been achieved with undegraded mirrors (Thieser et al., 2016).

pg 5 line 26. Why correct for humidity?

The discussion of systematic errors has been removed due to overlap with Thieser et al. (2016) and Friedrich et al. (2020). Correcting for ambient humidity is necessary due to the Rayleigh scattering of water and the zeroing of the TD-CRDS with dry synthetic air.

pg 6 line 14-16 How can the uncertainty of  $J$  data be 10% if upwelling radiation was not included?

We now write:

The overall uncertainty in  $J$  is ca. 15 %, which includes calibration accuracy (Bohn et al., 2008) and the neglect of upwelling radiation from the sea-surface

pg 6 line 25. Which meteorological field was used for the HYSPLIT trajectories?

[...], using the Global Data Assimilation System (GDAS1) meteorological model.

pg 17 section 3.4 "HONO formation"

The analysis appears to be only considering daytime processes in this section. How does the HONO budget during AQABA compared to the observations by Wojtal et al. (2011)?

We have included a remark about the daytime limitation of the analysis and give reference to the possibility of a nighttime pseudo stationary state between gas-phase HONO and HONO adsorbed to marine surfaces.

We emphasise that the analysis presented here focussed on the daytime chemistry of HONO. At nighttime, a pseudo stationary state, independent of fresh  $\text{NO}_x$  input, has been observed by Wojtal et al. (2011), and explained with a reversible deposition of HONO on marine surfaces. This will however be insignificant during the day.

pg 20 line 30. "HONO photolysis was as a significant source of  $\text{NO}_x$ ." It is not a net source if HONO is generated from  $\text{NO}_x$ .

This comment has misunderstood the point we are making:

We argue that HONO is not generated photochemically from  $\text{NO}_x$  (i.e. from  $\text{NO} + \text{OH}$ ) but from emissions of ships. If ships exhaust contains HONO (e.g on particles) then the  $\text{NO}_x$  that comes from HONO is not simply recycling  $\text{NO}_x$ .



## References

- Aldener, M., Brown, S. S., Stark, H., Williams, E. J., Lerner, B. M., Kuster, W. C., Goldan, P. D., Quinn, P. K., Bates, T. S., Fehsenfeld, F. C., and Ravishankara, A. R.: Reactivity and loss mechanisms of  $\text{NO}_3$  and  $\text{N}_2\text{O}_5$  in a polluted marine environment: Results from in situ measurements during New England Air Quality Study 2002, *Journal of Geophysical Research-Atmospheres*, 111, art. D23S73, doi 10.1029/2006JD007252, 2006.
- Bohn, B., Corlett, G. K., Gillmann, M., Sanghavi, S., Stange, G., Tensing, E., Vrekoussis, M., Bloss, W. J., Clapp, L. J., Kortner, M., Dorn, H. P., Monks, P. S., Platt, U., Plass-Dulmer, C., Mihalopoulos, N., Heard, D. E., Clemetshaw, K. C., Meixner, F. X., Prevot, A. S. H., and Schmitt, R.: Photolysis frequency measurement techniques: results of a comparison within the ACCENT project, *Atmospheric Chemistry and Physics*, 8, 5373-5391, 2008.
- Bourtsoukidis, E., Ernle, L., Crowley, J. N., Lelieveld, J., Paris, J. D., Pozzer, A., Walter, D., and Williams, J.: Non-methane hydrocarbon (C-2-C-8) sources and sinks around the Arabian Peninsula, *Atmos. Chem. Phys.*, 19, 7209-7232, 10.5194/acp-19-7209-2019, 2019.
- Bourtsoukidis, E., Pozzer, A., Sattler, T., Matthaïos, V. N., Ernle, L., Edtbauer, A., Fischer, H., Könemann, T., Osipov, S., Paris, J. D., Pfannerstill, E. Y., Stönnner, C., Tadic, I., Walter, D., Wang, N., Lelieveld, J., and Williams, J.: The Red Sea Deep Water is a potent source of atmospheric ethane and propane, *Nat. Commun.*, 11, 447, 10.1038/s41467-020-14375-0, 2020.
- Celik, S., Drewnick, F., Fachinger, F., Brooks, J., Darbyshire, E., Coe, H., Paris, J. D., Eger, P. G., Schuladen, J., Tadic, I., Friedrich, N., Dienhart, D., Hottmann, B., Fischer, H., Crowley, J. N., Harder, H., and Borrmann, S.: Influence of vessel characteristics and atmospheric processes on the gas and particle phase of ship emission plumes: in situ measurements in the Mediterranean Sea and around the Arabian Peninsula, *Atmos Chem Phys*, 20, 4713-4734, 10.5194/acp-20-4713-2020, 2020.
- Dai, J., and Wang, T.: Impact of International Shipping Emissions on Ozone and PM<sub>2.5</sub>: The Important Role of HONO and ClNO<sub>2</sub>, *Atmos. Chem. Phys. Discuss.*, 2021, 1-29, 10.5194/acp-2020-1185, 2021.
- Daum, P. H., Kleinman, L., Imre, D. G., Nunnermacker, L. J., Lee, Y. N., Springston, S. R., Newman, L., and Weinstein-Lloyd, J.: Analysis of the processing of Nashville urban emissions on July 3 and July 18, 1995, *J. Geophys. Res. -Atmos.*, 105, 9155-9164, Doi 10.1029/1999jd900997, 2000.
- Davis, D. D., Crawford, J., Chen, G., Chameides, W., Liu, S., Bradshaw, J., Sandholm, S., Sachse, G., Gregory, G., Anderson, B., Barrick, J., Bachmeier, A., Collins, J., Browell, E., Blake, D., Rowland, S., Kondo, Y., Singh, H., Talbot, R., Heikes, B., Merrill, J., Rodriguez, J., and Newell, R. E.: Assessment of ozone photochemistry in the western North Pacific as inferred from PEM-West A observations during the fall 1991, *J. Geophys. Res. -Atmos.*, 101, 2111-2134, Doi 10.1029/95jd02755, 1996.
- Edtbauer, A., Stönnner, C., Pfannerstill, E. Y., Berasategui, M., Walter, D., Crowley, J. N., Lelieveld, J., and Williams, J.: A new marine biogenic emission: methane sulfonamide (MSAM), dimethyl sulfide (DMS), and dimethyl sulfone (DMSO<sub>2</sub>) measured in air over the Arabian Sea, *Atmos. Chem. Phys.*, 20, 6081-6094, 10.5194/acp-20-6081-2020, 2020.

Eger, P. G., Friedrich, N., Schuladen, J., Shenolikar, J., Fischer, H., Tadic, I., Harder, H., Martinez, M., Rohloff, R., Tauer, S., Drewnick, F., Fachinger, F., Brooks, J., Darbyshire, E., Sciare, J., Pikridas, M., Lelieveld, J., and Crowley, J. N.: Shipborne measurements of ClNO<sub>2</sub> in the Mediterranean Sea and around the Arabian Peninsula during summer, *Atmospheric Chemistry and Physics*, 19, 12121-12140, 10.5194/acp-19-12121-2019, 2019.

Fried, A., McKeen, S., Sewell, S., Harder, J., Henry, B., Goldan, P., Kuster, W., Williams, E., Baumann, K., Shetter, R., and Cantrell, C.: Photochemistry of formaldehyde during the 1993 Tropospheric OH Photochemistry Experiment, *J. Geophys. Res. -Atmos.*, 102, 6283-6296, Doi 10.1029/96jd03249, 1997.

Friedrich, N., Tadic, I., Schuladen, J., Brooks, J., Darbyshire, E., Drewnick, F., Fischer, H., Lelieveld, J., and Crowley, J. N.: Measurement of NO<sub>x</sub> and NO<sub>y</sub> with a thermal dissociation cavity ring-down spectrometer (TD-CRDS): instrument characterisation and first deployment, *Atmos. Meas. Tech.*, 13, 5739-5761, 10.5194/amt-13-5739-2020, 2020.

Ge, B. Z., Sun, Y. L., Liu, Y., Dong, H. B., Ji, D. S., Jiang, Q., Li, J., and Wang, Z. F.: Nitrogen dioxide measurement by cavity attenuated phase shift spectroscopy (CAPS) and implications in ozone production efficiency and nitrate formation in Beijing, China, *J. Geophys. Res. -Atmos.*, 118, 9499-9509, 10.1002/jgrd.50757, 2013.

Lin, W., Xu, X., Ge, B., and Liu, X.: Gaseous pollutants in Beijing urban area during the heating period 2007-2008: variability, sources, meteorological, and chemical impacts, *Atmos. Chem. Phys.*, 11, 8157-8170, 10.5194/acp-11-8157-2011, 2011.

Liu, S. C., Trainer, M., Fehsenfeld, F. C., Parrish, D. D., Williams, E. J., Fahey, D. W., Hubler, G., and Murphy, P. C.: Ozone Production in the Rural Troposphere and the Implications for Regional and Global Ozone Distributions, *J. Geophys. Res. -Atmos.*, 92, 4191-4207, DOI 10.1029/JD092iD04p04191, 1987.

Longfellow, C. A., Ravishankara, A. R., and Hanson, D. R.: Reactive uptake on hydrocarbon soot: Focus on NO<sub>2</sub>, *Journal of Geophysical Research-Atmospheres*, 104, 13833-13840, 1999.

Ninneman, M., Lu, S., Lee, P., McQueen, J., Huang, J. P., Demerjian, K., and Schwab, J.: Observed and Model-Derived Ozone Production Efficiency over Urban and Rural New York State, *Atmosphere*, 8, ARTN 126  
10.3390/atmos8070126, 2017.

Nunnermacker, L. J., Weinstein-Lloyd, J., Kleinman, L., Daum, P. H., Lee, Y. N., Springston, S. R., Klotz, P., Newman, L., Neuroth, G., and Hyde, P.: Ground-based and aircraft measurements of trace gases in Phoenix, Arizona (1998), *Atmos. Env.*, 38, 4941-4956, 10.1016/j.atmosenv.2004.04.033, 2004.

Olszyna, K. J., Bailey, E. M., Simonaitis, R., and Meagher, J. F.: O<sub>3</sub> and NO<sub>y</sub> relationships at a rural Site, *J. Geophys. Res. -Atmos.*, 99, 14557-14563, Doi 10.1029/94jd00739, 1994.

Pfannerstill, E. Y., Wang, N. J., Edtbauer, A., Bourtsoukidis, E., Crowley, J. N., Dienhart, D., Eger, P. G., Ernle, L., Fischer, H., Hottmann, B., Paris, J. D., Stonner, C., Tadic, I., Walter, D., and Williams, J.:

Shipborne measurements of total OH reactivity around the Arabian Peninsula and its role in ozone chemistry, *Atmos. Chem. Phys.*, 19, 11501-11523, 10.5194/acp-19-11501-2019, 2019.

Rickard, A. R., Salisbury, G., Monks, P. S., Lewis, A. C., Baugitte, S., Bandy, B. J., Clemitshaw, K. C., and Penkett, S. A.: Comparison of measured ozone production efficiencies in the marine boundary layer at two European coastal sites under different pollution regimes, *J. Atmos. Chem.*, 43, 107-134, Doi 10.1023/A:1019970123228, 2002.

Roussel, P. B., Lin, X., Camacho, F., Laszlo, S., Taylor, R., Melo, O. T., Shepson, P. B., Hastie, D. R., and Niki, H.: Observations of ozone and precursor levels at two sites around Toronto, Ontario, during SONTOS 92, *Atmos. Env.*, 30, 2145-2155, Doi 10.1016/1352-2310(95)00102-6, 1996.

Sillman, S.: Ozone production efficiency and loss of NO<sub>x</sub> in power plant plumes: Photochemical model and interpretation of measurements in Tennessee, *J. Geophys. Res. -Atmos.*, 105, 9189-9202, Doi 10.1029/1999jd901014, 2000.

Stutz, J., Kim, E. S., Platt, U., Bruno, P., Perrino, C., and Febo, A.: UV-visible absorption cross sections of nitrous acid, *Journal of Geophysical Research-Atmospheres*, 105, 14585-14592, 2000.

Sun, Y., Wang, L. L., Wang, Y. S., Zhang, D. Q., Quan, L., and Xin, J. Y.: In situ measurements of NO, NO<sub>2</sub>, NO<sub>y</sub>, and O<sub>3</sub> in Dinghushan (112 degrees E, 23 degrees N), China during autumn 2008, *Atmos. Env.*, 44, 2079-2088, 10.1016/j.atmosenv.2010.03.007, 2010.

Tadic, I., Crowley, J. N., Dienhart, D., Eger, P., Harder, H., Hottmann, B., Martinez, M., Parchatka, U., Paris, J. D., Pozzer, A., Rohloff, R., Schuladen, J., Shenolikar, J., Tauer, S., Lelieveld, J., and Fischer, H.: Net ozone production and its relationship to nitrogen oxides and volatile organic compounds in the marine boundary layer around the Arabian Peninsula, *Atmos. Chem. Phys.*, 20, 6769-6787, 10.5194/acp-20-6769-2020, 2020.

Thieser, J., Schuster, G., Phillips, G. J., Reiffs, A., Parchatka, U., Pöhler, D., Lelieveld, J., and Crowley, J. N.: A two-channel, thermal dissociation cavity-ringdown spectrometer for the detection of ambient NO<sub>2</sub>, RO<sub>2</sub>NO<sub>2</sub> and RONO<sub>2</sub>, *Atmos. Meas. Tech.*, 9, 553-576, 10.5194/amt-9-553-2016, 2016.

Trainer, M., Parrish, D. D., Buhr, M. P., Norton, R. B., Fehsenfeld, F. C., Anlauf, K. G., Bottenheim, J. W., Tang, Y. Z., Wiebe, H. A., Roberts, J. M., Tanner, R. L., Newman, L., Bowersox, V. C., Meagher, J. F., Olszyna, K. J., Rodgers, M. O., Wang, T., Berresheim, H., Demerjian, K. L., and Roychowdhury, U. K.: Correlation of Ozone with NO<sub>y</sub> in Photochemically Aged Air, *Journal of Geophysical Research-Atmospheres*, 98, 2917-2925, Doi 10.1029/92jd01910, 1993.

Wang, J. H., Ge, B. Z., and Wang, Z. F.: Ozone Production Efficiency in Highly Polluted Environments, *Curr Pollut Rep*, 4, 198-207, 10.1007/s40726-018-0093-9, 2018.

Wang, T., Carroll, M. A., Albercook, G. M., Owens, K. R., Duderstadt, K. A., Markevitch, A. N., Parrish, D. D., Holloway, J. S., Fehsenfeld, F. C., Forbes, G., and Ogren, J.: Ground-based measurements of NO<sub>x</sub> and total reactive oxidized nitrogen (NO<sub>y</sub>) at Sable Island, Nova Scotia, during the NARE 1993 summer intensive, *J. Geophys. Res. -Atmos.*, 101, 28991-29004, Doi 10.1029/96jd01090, 1996.

Wojtal, P., Halla, J. D., and McLaren, R.: Pseudo steady states of HONO measured in the nocturnal marine boundary layer: a conceptual model for HONO formation on aqueous surfaces, *Atmos. Chem. Phys.*, 11, 3243-3261, 10.5194/acp-11-3243-2011, 2011.
